# Supplementary material for: Isotope dilution analysis of yttrium with labelled oxygen gas by dynamic reaction cell-ICP-MS: universal isotope dilution analysis
Source: Royal Society of Chemistry journal article supplement (doi:10.1039/c8ja00420j), 2019-01-01
Supplement: c8ja00420j1.pdf [file c8ja00420j1.pdf]

Electronic Supplementary Material (ESI) for Journal of Analytical Atomic Spectrometry. This journal is © The Royal Society of Chemistry 2017

### Supplementary Information

Table S1 Typical uncertainties for the individual Y measurements.

River water

| Symbol                                 | Value     | Standard uncertainty | Unit    | Rel. uncertainty | Type |                              |
|----------------------------------------|-----------|----------------------|---------|------------------|------|------------------------------|
| Major contributions to uncertainty     |           |                      |         |                  |      |                              |
| $R$                                    | 1.2634    | 0.0015               | ----    | 0.14 %           | A    | 10                           |
| $\gamma$                               | 0.9998    | 0.0000               | ----    | 0.00 %           | A    | 10                           |
| $R'$                                   | 0.5649    | 0.0015               | ----    | 0.45 %           | A    | 10                           |
| $\gamma'$                              | 0.9998    | 0.0000               | ----    | 0.00 %           | A    | 10                           |
| $R_x$                                  | 0.2368    | 0.0000               | ----    | 0.00 %           | A    | 10                           |
| $\gamma_x$                             | 1.0000    | 0.0000               | ----    | 0.00 %           | A    | 10                           |
| $R_z$                                  | 0.2368    | 0.0005               | ----    | 0.15 %           | A    | 10                           |
| $\gamma_z$                             | 0.9998    | 0.0000               | ----    | 0.00 %           | A    | 10                           |
| $D$                                    | 1.0000    | 0.0033               | ----    | 0.33 %           | A    | 3                            |
| $B$                                    | 0.0000    | 0.0000               | mg / kg | 0.00 %           | A    | 3                            |
| Secondary contributions to uncertainty |           |                      |         |                  |      |                              |
| $C_z$                                  | 0.2589    | 0.0008               | mg / kg | 0.30 %           | B    | Japanese calibration service |
| $R_y$                                  | 4590.0703 | 1853.8715            | ----    | 0.00 %           | B    |                              |
| $\gamma_y$                             | 1.0000    | 0.0000               | ----    | 0.00 %           | B    |                              |
| $m_x$                                  | 1.9999    | 0.0002               | g       | 0.01 %           | B    | Balance linearity            |
| $m_y$                                  | 0.1000    | 0.0002               | g       | 0.20 %           | B    | Balance linearity            |
| $m'_y$                                 | 0.9885    | 0.0002               | g       | 0.02 %           | B    | Balance linearity            |
| $m_z$                                  | 0.9912    | 0.0002               | g       | 0.02 %           | B    | Balance linearity            |
| $\sum \gamma_{xi} \cdot R_{xi}$        | 1.2368    | 0.0000               | ----    | 0.00 %           | B    |                              |
| $\sum \gamma_{zi} \cdot R_{zi}$        | 1.2368    | 0.0000               | ----    | 0.00 %           | B    |                              |
| $C_x$                                  | 0.00415   | ng / g               |         |                  |      |                              |
| $u(C_x)$                               | 0.00003   | ng / g               |         |                  |      |                              |
| $U$                                    | 0.00006   | ng / g               |         |                  |      |                              |
| $U (\%)$                               | 1.4       | %                    |         |                  |      |                              |

Plant sample

| Symbol                                 | Value     | Standard uncertainty | Unit    | Rel. uncertainty | Type |                              |
|----------------------------------------|-----------|----------------------|---------|------------------|------|------------------------------|
| Major contributions to uncertainty     |           |                      |         |                  |      |                              |
| $R$                                    | 0.4617    | 0.0010               | ----    | 0.72 %           | A    | 10                           |
| $\gamma$                               | 1.0029    | 0.0008               | ----    | 0.26 %           | A    | 10                           |
| $R'$                                   | 0.6527    | 0.0010               | ----    | 0.31 %           | A    | 10                           |
| $\gamma'$                              | 1.0029    | 0.0008               | ----    | 0.16 %           | A    | 10                           |
| $R_x$                                  | 0.3227    | 0.0000               | ----    | 0.00 %           | A    | 10                           |
| $\gamma_x$                             | 1.0000    | 0.0008               | ----    | 0.18 %           | A    | 10                           |
| $R_z$                                  | 0.3227    | 0.0006               | ----    | 0.17 %           | A    | 10                           |
| $\gamma_z$                             | 1.0029    | 0.0008               | ----    | 0.08 %           | A    | 10                           |
| $D$                                    | 1.0000    | 0.0040               | ----    | 0.40 %           | A    | 3                            |
| $B$                                    | 0.0000    | 0.0000               | mg / kg | 0.00 %           | A    | 3                            |
| Secondary contributions to uncertainty |           |                      |         |                  |      |                              |
| $C_z$                                  | 0.2589    | 0.0008               | mg / kg | 0.30 %           | B    | Japanese calibration service |
| $R_\gamma$                             | 4171.4283 | 1299.6369            | ----    | 0.00 %           | B    |                              |
| $\alpha_\gamma$                        | 1.0000    | 0.0000               | ----    | 0.00 %           | B    |                              |
| $m_x$                                  | 5.5764    | 0.0002               | g       | 0.00 %           | B    | Balance linearity            |
| $m_\gamma$                             | 0.9877    | 0.0002               | g       | 0.02 %           | B    | Balance linearity            |
| $m'_\gamma$                            | 0.9885    | 0.0002               | g       | 0.02 %           | B    | Balance linearity            |
| $m_z$                                  | 0.9912    | 0.0002               | g       | 0.02 %           | B    | Balance linearity            |
| $\sum \gamma x_i \cdot R x_i$          | 1.3227    | 0.0000               | ----    | 0.00 %           | B    |                              |
| $\sum \gamma z_i \cdot R z_i$          | 1.3227    | 0.0000               | ----    | 0.00 %           | B    |                              |
| $C_x$                                  | 108.5     | ng / g               |         |                  |      |                              |
| $u(C_x)$                               | 1.1       | ng / g               |         |                  |      |                              |
| $U$                                    | 2.2       | ng / g               |         |                  |      |                              |
| $U (\%)$                               | 2.0       | %                    |         |                  |      |                              |
